# Supplementary material
Source: PubMed Central journal article supplement (PMC3230309)
Supplement: cbt1102_0204SD1.pdf [file cbt1102_0204SD1.pdf]

**Table 1.** Clustered common genes showing deregulated pattern of expression in docetaxel resistant PC-3 cell clones maintained without or with docetaxel in media as compared to untreated parental cells. The gene list shows values obtained with RankProd method. FC (fold change): Blank field = no change. Positive value = elevated expression. Negative value = lowered expression. FDR = false discovery rate

| Probe ID                                       | Gene                                                                | 8b2   |        |          | 8b2 + docetaxel |          |          | 1-INT |        |          | 1-INT + docetaxel |        |          |        |        |          |
|------------------------------------------------|---------------------------------------------------------------------|-------|--------|----------|-----------------|----------|----------|-------|--------|----------|-------------------|--------|----------|--------|--------|----------|
|                                                |                                                                     | FC    | FDR    | P value  | FC              | FDR      | P value  | FC    | FDR    | P value  | FC                | FDR    | P value  |        |        |          |
| <b>Regulation of cell death/apoptosis</b>      |                                                                     |       |        |          |                 |          |          |       |        |          |                   |        |          |        |        |          |
| 204777_s_at                                    | MAL: mal, T-cell differentiation protein                            |       |        |          | 3.93            | 0.0092   | 0        | 3.10  | 0.0222 | 1.00E-04 | 5.03              | 0.003  | 0        | 4.76   | 0.0053 | 0        |
| 203140_at                                      | BCL6: B-cell CLL/lymphoma 6                                         | 3.42  | 0.0162 | 0        | 3.37            | 0.0042   | 0        | 2.90  | 0.0277 | 1.00E-04 | 6.28              | 0.0019 | 0        | 7.26   | 0.0019 | 0        |
| 225912_at                                      | TP53INP1: Tumor protein p53 inducible nuclear protein 1             | 2.81  | 0.0328 | 1.00E-04 | 3.12            | 0.0209   | 1.00E-04 | -2.51 | 0.0414 | 2.00E-04 | -2.30             | 0.0237 | 1.00E-04 | -2.01  | 0.0454 | 2.00E-04 |
| 224917_at                                      | MIR21: microRNA 21                                                  |       |        |          | 2.88            | 0.0297   | 1.00E-04 | -3.61 | 0.0111 | 0        | -2.30             | 0.0201 | 0        | -2.18  | 0.021  | 1.00E-04 |
| 218858_at                                      | DEPDC6: DEP domain containing 6                                     |       |        |          | 2.75            | 0.035    | 1.00E-04 |       |        |          |                   |        |          |        |        |          |
| 202643_s_at                                    | TNFALP3: tumor necrosis factor, alpha-induced protein 3             | -2.56 | 0.0309 | 1.00E-04 | -2.84           | 0.0215   | 1.00E-04 |       |        |          |                   |        |          |        |        |          |
| 226142_at                                      | GLI1PR1: GLI pathogenesis-related 1                                 | -3.90 | 0.0063 | 0        | -3.93           | 0.0086   | 0        |       |        |          | -4.17             | 0.0023 | 0        | -4.07  | 0.0033 | 0        |
| 204614_at                                      | SERPINB2: serpin peptidase inhibitor, clade B (ovalbumin), member 2 | -8.91 | 0.0012 | 0        | -7.57           | 0.001    | 0        |       |        |          | -11.22            | 0.001  | 0        | -10.89 | 0.002  | 0        |
| <b>Regulation of cell cycle</b>                |                                                                     |       |        |          |                 |          |          |       |        |          |                   |        |          |        |        |          |
| 202769_at                                      | CCNG2: cyclin G2                                                    | 2.52  | 0.047  | 3.00E-04 | 2.98            | 0.0259   | 1.00E-04 | 4.01  | 0.0102 | 0        | 3.51              | 0.0106 | 0        | 4.01   | 0.0102 | 0        |
| <b>Regulation of cell growth/proliferation</b> |                                                                     |       |        |          |                 |          |          |       |        |          |                   |        |          |        |        |          |
| 210095_s_at                                    | IGFBP3: insulin-like growth factor binding protein 3                | 15.82 | 0      | 0        | 14.17           | 8.00E-04 | 0        | 2.54  | 0.0485 | 3.00E-04 | 2.62              | 0.0291 | 1.00E-04 | 2.54   | 0.0485 | 3.00E-04 |
| 205081_at                                      | CRIP1: cysteine-rich protein 1 (intestinal)                         | 5.44  | 0.0043 | 0        | 5.66            | 0        | 0        | 9.50  | 0      | 0        | 9.67              | 0      | 0        | 9.50   | 0      | 0        |
| 224797_at                                      | ARRDC3: arrestin domain containing 3                                | 3.42  | 0.0163 | 0        | 3.46            | 0.0149   | 0        | 6.08  | 0.0028 | 0        | 4.73              | 0.0044 | 0        | 6.08   | 0.0028 | 0        |
| 213548_s_at                                    | CDV3: CDV3 homolog (mouse)                                          |       |        |          | -2.41           | 0.0402   | 2.00E-04 | -2.59 | 0.0115 | 0        |                   |        |          | -2.59  | 0.0115 | 0        |
| 207850_at                                      | CXCL3: chemokine (C-X-C motif) ligand 3                             |       |        |          | -2.51           | 0.0329   | 1.00E-04 | -2.06 | 0.0266 | 1.00E-04 |                   |        |          | -2.06  | 0.0266 | 1.00E-04 |
| 223710_at                                      | CCL26: chemokine (C-C motif) ligand 26                              |       |        |          | -2.56           | 0.036    | 1.00E-04 | -2.34 | 0.0196 | 0        |                   |        |          | -2.34  | 0.0196 | 0        |
| 210310_s_at                                    | FGF5: fibroblast growth factor 5                                    | -2.88 | 0.0182 | 0        | -2.72           | 0.0239   | 1.00E-04 | -3.34 | 0.0054 | 0        | -3.33             | 0.0052 | 0        | -3.34  | 0.0054 | 0        |
| 206924_at                                      | IL11: interleukin 11                                                | -3.03 | 0.0147 | 0        | -3.14           | 0.0156   | 0        | -3.62 | 0.0034 | 0        | -3.25             | 0.0054 | 0        | -3.62  | 0.0034 | 0        |
| 1552721_a_at                                   | FGF1: fibroblast growth factor 1                                    | -3.50 | 0.0091 | 0        | -4.28           | 0.0065   | 0        | -6.03 | 0.0016 | 0        | -4.40             | 0.0019 | 0        | -6.03  | 0.0016 | 0        |
| 215101_s_at                                    | CXCL5: chemokine (C-X-C motif) ligand 5                             | -4.04 | 0.0063 | 0        | -5.11           | 0.0037   | 0        | -4.30 | 0.0035 | 0        | -3.11             | 0.0058 | 0        | -4.30  | 0.0035 | 0        |
| 208394_x_at                                    | ESM1: endothelial cell-specific molecule 1                          | -4.21 | 0.0057 | 0        | -5.60           | 0.0031   | 0        | -4.48 | 0.0038 | 0        | -4.16             | 0.0024 | 0        | -4.48  | 0.0038 | 0        |
| 39402_at                                       | IL1B: Interleukin 1, beta                                           | -4.38 | 0.0054 | 0        | -4.64           | 0.0047   | 0        | -3.10 | 0.0063 | 0        | -2.66             | 0.0121 | 0        | -3.10  | 0.0063 | 0        |
| <b>Extracellular matrix/adhesion</b>           |                                                                     |       |        |          |                 |          |          |       |        |          |                   |        |          |        |        |          |
| 212158_at                                      | SDC2: syndecan 2                                                    | 3.32  | 0.0175 | 0        | 3.10            | 0.0222   | 1.00E-04 | 4.76  | 0.0053 | 0        | 5.03              | 0.003  | 0        | 4.76   | 0.0053 | 0        |
| 202291_s_at                                    | MGP: matrix Gla protein                                             | 2.70  | 0.0367 | 1.00E-04 | 2.90            | 0.0277   | 1.00E-04 | 7.26  | 0.0019 | 0        | 6.28              | 0.0019 | 0        | 7.26   | 0.0019 | 0        |
| 228640_at                                      | PCDH7: protocadherin 7                                              | -2.64 | 0.0304 | 1.00E-04 | -2.51           | 0.0414   | 2.00E-04 | -2.01 | 0.0454 | 2.00E-04 | -2.30             | 0.0237 | 1.00E-04 | -2.01  | 0.0454 | 2.00E-04 |
| 202638_s_at                                    | ICAM1: intercellular adhesion molecule 1                            | -3.24 | 0.0109 | 0        | -3.61           | 0.0111   | 0        | -2.18 | 0.021  | 1.00E-04 | -2.30             | 0.0201 | 0        | -2.18  | 0.021  | 1.00E-04 |

|                                              |                                                                          |        |        |          |        |          |          |        |          |        |        |          |
|----------------------------------------------|--------------------------------------------------------------------------|--------|--------|----------|--------|----------|----------|--------|----------|--------|--------|----------|
| 236179_at                                    | CDH11: cadherin 11, type 2, OB-cadherin (osteoblast)                     | -3.94  | 0.0065 | 0        | -5.04  | 0.0039   | 0        | -10.35 | 0        | -9.50  | 0.0014 | 0        |
| 237411_at                                    | ADAMTS6: ADAM metalloproteinase with thrombospondin type 1 motif, 6      | -5.17  | 0.0026 | 0        | -6.18  | 0.0031   | 0        | -3.84  | 0.0031   | -3.84  | 0.0031 | 0        |
| 205959_at                                    | MMP13: matrix metalloproteinase 13 (collagenase 3)                       | -5.49  | 0.0026 | 0        | -5.16  | 0.0038   | 0        | -4.67  | 0.0018   | -5.13  | 0.0032 | 0        |
| 207517_at                                    | LAMC2: laminin, gamma 2                                                  | -5.72  | 0.0026 | 0        | -6.02  | 0.0024   | 0        | -2.54  | 0.0136   | -2.63  | 0.0113 | 0        |
| 201506_at                                    | TGFBI: transforming growth factor beta-induced                           | -7.38  | 0.0019 | 0        | -8.38  | 9.00E-04 | 0        | -2.25  | 0.0217   | -2.45  | 0.0103 | 0        |
| <b>Cytoskeleton (other than microtubule)</b> |                                                                          |        |        |          |        |          |          |        |          |        |        |          |
| 227949_at                                    | PHACTR3: phosphatase and actin regulator 3                               | 3.41   | 0.016  | 0        | 4.58   | 0.006    | 0        | 2.69   | 0.0272   | 3.60   | 0.0154 | 0        |
| 212328_at                                    | LIMCH1: LIM and calponin homology domains 1                              |        |        |          | 2.78   | 0.0334   | 1.00E-04 |        | 0.0319   | 2.89   | 0.0319 | 1.00E-04 |
| 201310_s_at                                  | C5orf13: chromosome 5 open reading frame 13                              | 2.64   | 0.0404 | 2.00E-04 | 2.57   | 0.0432   | 2.00E-04 | 2.83   | 0.0219   | 2.83   | 0.0332 | 1.00E-04 |
| 222457_s_at                                  | LIMA1: LIM domain and actin binding 1                                    |        |        |          | -2.40  | 0.0404   | 2.00E-04 |        |          | -2.56  | 0.0117 | 0        |
| 227529_s_at                                  | AKAP12:A kinase (PRKA) anchor protein 12                                 | -2.55  | 0.0311 | 1.00E-04 | -2.65  | 0.027    | 1.00E-04 | -2.53  | 0.0137   | -2.52  | 0.0126 | 0        |
| 219165_at                                    | PDLIM2: PDZ and LIM domain 2 (mystique)                                  | -2.65  | 0.026  | 1.00E-04 | -2.63  | 0.0275   | 1.00E-04 | -2.15  | 0.0258   | -2.08  | 0.0261 | 1.00E-04 |
| 213684_s_at                                  | PDLIM5: PDZ and LIM 5                                                    | -2.83  | 0.0191 | 0        | -2.77  | 0.0226   | 1.00E-04 | -3.45  | 0.0045   | -2.90  | 0.0072 | 0        |
| 1567107_s_at                                 | TPM4: tropomyosin 4                                                      | -3.03  | 0.0145 | 0        | -3.30  | 0.0134   | 0        | -2.43  | 0.0166   | -2.10  | 0.0247 | 1.00E-04 |
| 221801_x_at                                  | NEFL: neurofilament, light polypeptide                                   |        |        |          | -3.07  | 0.0167   | 0        |        |          | -1.89  | 0.0418 | 2.00E-04 |
| 215189_at                                    | KRT86 /// LOC100134394: keratin 86 /// hypothetical protein LOC100134394 | -3.10  | 0.0138 | 0        | -3.08  | 0.0164   | 0        | -2.85  | 0.0089   | -3.12  | 0.0063 | 0        |
| 201430_s_at                                  | DPYSL3: dihydropyrimidinase-like 3                                       | -3.39  | 0.0098 | 0        | -4.13  | 0.0069   | 0        | -2.11  | 0.0283   | -2.01  | 0.0301 | 1.00E-04 |
| 1555673_at                                   | KAP2.1B: keratin-associated protein 2.1B                                 | -3.64  | 0.0075 | 0        | -4.13  | 0.0069   | 0        | -6.48  | 0.001    | -6.57  | 0.0012 | 0        |
| 204455_at                                    | DST: dystonin                                                            | -4.27  | 0.0052 | 0        | -4.74  | 0.0043   | 0        | -3.25  | 0.0055   | -3.11  | 0.0064 | 0        |
| 205547_s_at                                  | TAGLN: transgelin                                                        | -15.72 | 0      | 0        | -16.95 | 0        | 0        | -10.77 | 0        | -14.33 | 0      | 0        |
| <b>Microtubule cytoskeleton</b>              |                                                                          |        |        |          |        |          |          |        |          |        |        |          |
| 209118_s_at                                  | TUBA1A: tubulin, alpha 1a                                                | 4.75   | 0.0048 | 0        | 4.98   | 0.0049   | 0        | 3.54   | 0.0105   | 3.49   | 0.0164 | 0        |
| 212675_s_at                                  | CEP68: centrosomal protein 68kDa                                         |        |        |          | 2.67   | 0.0382   | 2.00E-04 |        |          | 3.10   | 0.0253 | 1.00E-04 |
| 226757_at                                    | IFIT2: interferon-induced protein with tetratricopeptide repeats 2       |        |        |          | 2.46   | 0.0498   | 3.00E-04 |        |          | 4.93   | 0.0051 | 0        |
| 1552658_a_at                                 | NAV3: neuron navigator 3                                                 | -4.29  | 0.0052 | 0        | -4.96  | 0.0037   | 0        | -4.91  | 0.0015   | -4.14  | 0.0033 | 0        |
| <b>Response to stress/chemical stimulus</b>  |                                                                          |        |        |          |        |          |          |        |          |        |        |          |
| 206857_s_at                                  | FKBP1B: FK506 binding protein 1B, 12.6kDa                                | 5.86   | 0.0036 | 0        | 5.57   | 0.0023   | 0        | 2.97   | 0.0186   | 2.98   | 0.029  | 1.00E-04 |
| 227803_at                                    | ENPP5: ectonucleotide pyrophosphatase/phosphodiesterase 5                | 5.47   | 0.0041 | 0        | 5.33   | 0.0031   | 0        | 3.20   | 0.014    | 4.08   | 0.0089 | 0        |
| 201626_at                                    | INSIG1: insulin induced gene                                             | 2.61   | 0.0423 | 2.00E-04 | 2.75   | 0.035    | 1.00E-04 | 2.85   | 0.0225   | 2.97   | 0.029  | 1.00E-04 |
| 203828_s_at                                  | IL32: interleukin 32                                                     |        |        |          | -2.39  | 0.0408   | 2.00E-04 |        |          | -2.21  | 0.0198 | 0        |
| 210001_s_at                                  | SOCS1: suppressor of cytokine signaling 1                                | -2.70  | 0.0246 | 1.00E-04 | -2.52  | 0.0331   | 1.00E-04 | -2.25  | 0.0215   | -2.35  | 0.0157 | 0        |
| 221667_s_at                                  | HSPB8: heat shock 22kDa protein 8                                        | -3.66  | 0.0075 | 0        | -3.65  | 0.0109   | 0        | -2.41  | 0.0175   | -2.77  | 0.0093 | 0        |
| 217767_at                                    | C3: complement component 3                                               | -4.17  | 0.0055 | 0        | -3.89  | 0.0085   | 0        | -2.35  | 0.0178   | -2.16  | 0.0216 | 1.00E-04 |
| 231240_at                                    | DIO2: deiodinase, iodothyronine, type II                                 | -4.96  | 0.0035 | 0        | -4.25  | 0.0062   | 0        | -2.90  | 0.0081   | -2.62  | 0.0114 | 0        |
| 204363_at                                    | F3: coagulation factor III (thromboplastin, tissue factor)               | -5.02  | 0.0027 | 0        | -5.16  | 0.003    | 0        | -5.46  | 8.00E-04 | -5.92  | 0.0015 | 0        |
| 202627_s_at                                  | SERPINE1: serpin peptidase inhibitor, clade E (nexin), member 1          | -11.20 | 0.0012 | 0        | -15.62 | 0        | 0        | -8.04  | 9.00E-04 | -12.75 | 0      | 0        |

|                                                   |                                                                               |       |          |          |       |        |          |       |        |          |       |          |          |
|---------------------------------------------------|-------------------------------------------------------------------------------|-------|----------|----------|-------|--------|----------|-------|--------|----------|-------|----------|----------|
| 211924_s_at                                       | PLAUR: plasminogen activator, urokinase receptor                              | -2.86 | 0.0189   | 0        | -3.15 | 0.0155 | 0        | -2.19 | 0.0235 | 1.00E-04 | -2.27 | 0.0175   | 0        |
| 227997_at                                         | IL17RD: interleukin 17 receptor D                                             | 3.68  | 0.0128   | 0        | 3.51  | 0.0138 | 0        | 3.08  | 0.0158 | 0        | 3.33  | 0.0202   | 0        |
| <b>Signal transducer activity</b>                 |                                                                               |       |          |          |       |        |          |       |        |          |       |          |          |
| 205990_s_at                                       | WNT5A: wingless-type MMTV integration site family, member 5A                  | 3.49  | 0.0155   | 0        | 3.44  | 0.015  | 0        | 5.02  | 0.003  | 0        | 5.43  | 0.0044   | 0        |
| 205387_s_at                                       | CGB: chorionic gonadotropin, beta polypeptide                                 | -2.63 | 0.028    | 1.00E-04 | -2.35 | 0.0433 | 2.00E-04 | -2.12 | 0.0276 | 1.00E-04 | -2.29 | 0.0172   | 0        |
| 224215_s_at                                       | DLL1: delta-like 1 (Drosophila)                                               | -2.83 | 0.0197   | 1.00E-04 | -3.57 | 0.0115 | 0        | -2.24 | 0.0216 | 1.00E-04 | -2.09 | 0.026    | 1.00E-04 |
| <b>GTPase binding activity</b>                    |                                                                               |       |          |          |       |        |          |       |        |          |       |          |          |
| 202748_at                                         | GBP2: guanylate binding protein 2, interferon-inducible                       | -5.29 | 0.0028   | 0        | -5.07 | 0.0038 | 0        | -3.77 | 0.0033 | 0        | -3.30 | 0.0054   | 0        |
| 231577_s_at                                       | GBP1: guanylate binding protein 1, interferon-inducible, 67kDa                | -8.81 | 0.0014   | 0        | -9.54 | 0.0012 | 0        | -7.36 | 0.001  | 0        | -7.54 | 0.001    | 0        |
| <b>GTPase regulator activity</b>                  |                                                                               |       |          |          |       |        |          |       |        |          |       |          |          |
| 225056_at                                         | SIPA1L2: signal-induced proliferation-associated 1 like 2                     | 3.38  | 0.0166   | 0        | 3.67  | 0.0126 | 0        | 3.74  | 0.0088 | 0        | 4.52  | 0.0061   | 0        |
| 206636_at                                         | RASA2: RAS p21 protein activator 2                                            |       |          |          | -2.39 | 0.0412 | 2.00E-04 |       |        |          | -2.15 | 0.0235   | 1.00E-04 |
| <b>Transporter activity and metabolic process</b> |                                                                               |       |          |          |       |        |          |       |        |          |       |          |          |
| 221583_s_at                                       | KCNMA1: potassium large conductance calcium-activated channel                 | 6.80  | 0.0022   | 0        | 6.59  | 0.0012 | 0        | 9.53  | 0      | 0        | 9.19  | 5.00E-04 | 0        |
| 205513_at                                         | TCN1: transcobalamin I (vitamin B12 binding protein, R binder family)         | 5.37  | 0.0043   | 0        | 5.75  | 0.0012 | 0        | 6.66  | 0.0012 | 0        | 7.60  | 0.0015   | 0        |
| 223044_at                                         | SLC40A1: solute carrier family 40 (iron-regulated transporter), member 1      | 3.28  | 0.0229   | 1.00E-04 | 3.46  | 0.0134 | 0        | 2.85  | 0.022  | 1.00E-04 | 3.53  | 0.0165   | 0        |
| 244353_s_at                                       | SLC2A12: solute carrier family 2 (facilitated glucose transporter), member 12 | 3.15  | 0.0229   | 1.00E-04 | 3.13  | 0.0198 | 1.00E-04 | 2.62  | 0.0289 | 1.00E-04 | 3.23  | 0.021    | 1.00E-04 |
| 204401_at                                         | KCNND4: potassium intermediate/small conductance calcium-activated channel    | 3.05  | 0.0258   | 1.00E-04 | 3.10  | 0.0218 | 1.00E-04 | 2.85  | 0.0225 | 1.00E-04 | 2.83  | 0.0332   | 1.00E-04 |
| 243711_at                                         | DDAH1: dimethylarginine dimethylaminohydrolase 1                              | -2.50 | 0.0337   | 1.00E-04 | -2.38 | 0.0433 | 2.00E-04 | -2.29 | 0.0207 | 0        | -2.44 | 0.0144   | 0        |
| 206566_at                                         | SLC7A1: solute carrier family 7 (cationic amino acid transporter, y+ system)  | -2.96 | 0.0188   | 0        | -2.96 | 0.0188 | 0        | -2.96 | 0.0188 | 0        | -2.50 | 0.0131   | 0        |
| 225782_at                                         | MSRB3: methionine sulfoxide reductase B3                                      | -3.05 | 0.0159   | 0        | -3.19 | 0.0153 | 0        | -2.09 | 0.0283 | 1.00E-04 | -2.03 | 0.029    | 1.00E-04 |
| <b>Lipid metabolic process</b>                    |                                                                               |       |          |          |       |        |          |       |        |          |       |          |          |
| 202436_s_at                                       | CYP1B1: cytochrome P450, family 1, subfamily B, polypeptide 1                 | 12.43 | 8.00E-04 | 0        | 18.55 | 0      | 0        | 5.99  | 0.0018 | 0        | 13.21 | 0        | 0        |
| 203913_s_at                                       | HPGD: hydroxyprostaglandin dehydrogenase 15-(NAD)                             | 5.17  | 0.0041   | 0        | 6.31  | 0.0019 | 0        | 2.80  | 0.0254 | 1.00E-04 | 4.31  | 0.0078   | 0        |
| 238681_at                                         | GDPD1: glycerophosphodiester phosphodiesterase domain containing 1            | 4.07  | 0.0106   | 0        | 3.87  | 0.0097 | 0        | 2.98  | 0.0186 | 0        | 3.56  | 0.0164   | 0        |
| 215723_s_at                                       | PLD1: phospholipase D1, phosphatidylcholine-specific                          | 3.01  | 0.026    | 1.00E-04 | 3.10  | 0.0218 | 1.00E-04 | 2.65  | 0.0288 | 1.00E-04 | 2.78  | 0.0356   | 1.00E-04 |

|                                 |                                                                             |       |          |          |       |          |          |        |          |          |        |        |          |  |
|---------------------------------|-----------------------------------------------------------------------------|-------|----------|----------|-------|----------|----------|--------|----------|----------|--------|--------|----------|--|
| 202054_s_at                     | ALDH3A2: aldehyde dehydrogenase 3 family, member A2                         | 2.63  | 0.0406   | 2.00E-04 | 2.66  | 0.0391   | 2.00E-04 | 2.26   | 0.0489   | 3.00E-04 | 2.76   | 0.0354 | 1.00E-04 |  |
| 209160_at                       | AKR1C3: aldo-keto reductase family 1, member C3                             |       |          |          | 2.55  | 0.0444   | 2.00E-04 |        |          |          | 6.04   | 0.0029 | 0        |  |
| 242963_at                       | SGMS2: sphingomyelin synthase 2                                             |       |          |          | -2.30 | 0.0473   | 2.00E-04 |        |          |          | -1.83  | 0.0498 | 2.00E-04 |  |
| 1554997_a_at                    | PTGS2: prostaglandin-endoperoxide synthase 2                                | -3.81 | 0.0074   | 0        | -3.56 | 0.0114   | 0        | -10.32 | 0        | 0        | -11.09 | 0      | 0        |  |
| <b>Chromatin organization</b>   |                                                                             |       |          |          |       |          |          |        |          |          |        |        |          |  |
| 218729_at                       | LXN: latexin                                                                |       |          |          | 3.69  | 0.0117   | 0        |        |          |          | 2.85   | 0.0325 | 1.00E-04 |  |
| 210255_at                       | RAD51L1: RAD51-like 1 (S. cerevisiae)                                       | 3.38  | 0.0163   | 0        | 3.09  | 0.0217   | 1.00E-04 | 2.46   | 0.037    | 2.00E-04 | 2.52   | 0.049  | 3.00E-04 |  |
| 214455_at                       | HIST1H2BC: histone cluster 1, H2bc                                          | 2.93  | 0.0291   | 1.00E-04 | 2.73  | 0.0353   | 1.00E-04 | 4.14   | 0.0061   | 0        | 4.16   | 0.009  | 0        |  |
| 214472_at                       | HIST1H2AD: histone cluster 1, H2ad                                          |       |          |          | 2.62  | 0.04     | 2.00E-04 |        |          |          | 3.25   | 0.0213 | 1.00E-04 |  |
| 215071_s_at                     | HIST1H2AC: histone cluster 1, H2ac                                          | 2.59  | 0.0434   | 2.00E-04 | 2.59  | 0.0422   | 2.00E-04 | 3.26   | 0.014    | 0        | 3.63   | 0.0147 | 0        |  |
| 208180_s_at                     | HIST1H4A: histone cluster 1, H4a                                            | 2.53  | 0.0465   | 3.00E-04 | 2.47  | 0.0497   | 3.00E-04 | 3.60   | 0.0094   | 0        | 3.71   | 0.0138 | 0        |  |
| <b>Transcription regulation</b> |                                                                             |       |          |          |       |          |          |        |          |          |        |        |          |  |
| 227404_s_at                     | EGR1: early growth response 1                                               | 14.74 | 0        | 0        | 11.25 | 0        | 0        | 18.48  | 0        | 0        | 11.78  | 0      | 0        |  |
| 206059_at                       | ZNF91: zinc finger protein 91                                               | 10.78 | 7.00E-04 | 0        | 11.65 | 0.0014   | 0        | 9.21   | 0        | 0        | 11.39  | 0      | 0        |  |
| 215729_s_at                     | VGLL1: vestigial like 1 (Drosophila)                                        |       |          |          | 7.53  | 7.00E-04 | 0        |        |          |          | 3.09   | 0.0259 | 1.00E-04 |  |
| 236429_at                       | ZNF83: zinc finger protein 83                                               | 7.25  | 0.0017   | 0        | 9.36  | 8.00E-04 | 0        | 4.39   | 0.0053   | 0        | 4.95   | 0.0052 | 0        |  |
| 230720_at                       | RNF182: ring finger protein 182                                             | 5.49  | 0.0044   | 0        | 5.27  | 0.0031   | 0        | 4.39   | 0.0057   | 0        | 4.57   | 0.0054 | 0        |  |
| 223714_at                       | ZNF256: zinc finger protein 256                                             | 4.56  | 0.007    | 0        | 4.58  | 0.0063   | 0        | 4.08   | 0.006    | 0        | 4.22   | 0.0081 | 0        |  |
| 221911_at                       | ETV1: ets variant 1                                                         | 3.35  | 0.0106   | 0        | 3.80  | 0.0105   | 0        | 4.96   | 0.0036   | 0        | 5.79   | 0.0031 | 0        |  |
| 207120_at                       | ZNF667: zinc finger protein 667                                             | 3.33  | 0.0172   | 0        | 3.01  | 0.0239   | 1.00E-04 | 3.07   | 0.0156   | 0        | 3.89   | 0.0118 | 0        |  |
| 201565_s_at                     | ID2: inhibitor of DNA binding 2, dominant negative helix-loop-helix protein | 3.76  | 0.0119   | 0        | 3.39  | 0.0154   | 0        | 2.33   | 0.0435   | 2.00E-04 | 2.53   | 0.049  | 3.00E-04 |  |
| 229614_at                       | ZNF320: zinc finger protein 320                                             | 3.35  | 0.0169   | 0        | 3.35  | 0.0167   | 0        | 2.98   | 0.0185   | 0        | 3.19   | 0.0231 | 1.00E-04 |  |
| 242463_x_at                     | ZNF600: zinc finger protein 600                                             | 3.75  | 0.0119   | 0        | 3.72  | 0.0118   | 0        | 2.51   | 0.0341   | 1.00E-04 | 3.24   | 0.0216 | 1.00E-04 |  |
| 204917_s_at                     | MLLT3: myeloid/lymphoid or mixed-lineage leukemia                           | 3.21  | 0.0209   | 1.00E-04 | 2.76  | 0.0337   | 1.00E-04 | 2.69   | 0.027    | 1.00E-04 | 2.56   | 0.048  | 3.00E-04 |  |
| 231786_at                       | HOXA13: homeobox A13                                                        |       |          |          | 3.07  | 0.0227   | 1.00E-04 |        |          |          | 2.63   | 0.0434 | 2.00E-04 |  |
| 203232_s_at                     | ATXN1: ataxin 1                                                             |       |          |          | 3.07  | 0.0223   | 1.00E-04 |        |          |          | 2.87   | 0.0317 | 1.00E-04 |  |
| 1567032_s_at                    | ZNF160: zinc finger protein 160                                             | 3.04  | 0.025    | 1.00E-04 | 2.72  | 0.0354   | 1.00E-04 | 2.53   | 0.0324   | 1.00E-04 | 2.72   | 0.0371 | 2.00E-04 |  |
| 203394_s_at                     | HES1: hairy and enhancer of split 1 (Drosophila)                            | 2.65  | 0.0405   | 2.00E-04 | 2.38  | 0.0457   | 3.00E-04 | 2.56   | 0.0323   | 1.00E-04 | 2.43   | 0.0444 | 3.00E-04 |  |
| 39549_at                        | NPAS2: neuronal PAS domain protein 2                                        | 2.53  | 0.0467   | 3.00E-04 | 2.74  | 0.0349   | 1.00E-04 | 3.02   | 0.0176   | 0        | 3.98   | 0.011  | 0        |  |
| 215605_s_at                     | STRN3: stratin, calmodulin binding protein 3                                |       |          |          | -2.46 | 0.0375   | 2.00E-04 |        |          |          | -2.03  | 0.029  | 1.00E-04 |  |
| 206127_at                       | ELK3: ELK3, ETS-domain protein (SRF accessory protein 2)                    |       |          |          | -2.67 | 0.0265   | 1.00E-04 |        |          |          | -1.86  | 0.0485 | 2.00E-04 |  |
| 205205_at                       | RELB: v-rel reticuloendotheliosis viral oncogene homolog B                  | -2.64 | 0.027    | 1.00E-04 | -2.74 | 0.0044   | 0        | -3.44  | 0.0452   | 1.00E-04 | -3.04  | 0.0068 | 0        |  |
| 207635_s_at                     | NFKB2: nuclear factor of kappa light polypeptide gene enhancer in B-cells   | -3.06 | 0.0143   | 0        | -3.30 | 0.0136   | 0        | -3.29  | 0.0053   | 0        | -2.86  | 0.0075 | 0        |  |
| 207109_at                       | POU2F3: POU class 2 homeobox 3                                              | -3.07 | 0.0143   | 0        | -3.07 | 0.0165   | 0        | -3.17  | 0.0057   | 0        | -2.50  | 0.0132 | 0        |  |
| 235417_at                       | SPOCD1: SPOC domain containing 1                                            | -3.16 | 0.0124   | 0        | -2.75 | 0.0235   | 1.00E-04 | -2.23  | 0.0238   | 1.00E-04 | -2.16  | 0.0223 | 1.00E-04 |  |
| 213667_at                       | SRCAP: SM2-related CREBBP activator protein                                 | -3.45 | 0.0094   | 0        | -3.62 | 0.0111   | 0        | -2.81  | 0.0091   | 0        | -2.49  | 0.0129 | 0        |  |
| 224341_x_at                     | TLR4: toll-like receptor 4                                                  | -4.65 | 0.005    | 0        | -5.00 | 0.0038   | 0        | -5.61  | 9.00E-04 | 0        | -5.22  | 0.0027 | 0        |  |

|             |                                                                                            |        |        |          |        |          |          |       |          |          |       |        |          |
|-------------|--------------------------------------------------------------------------------------------|--------|--------|----------|--------|----------|----------|-------|----------|----------|-------|--------|----------|
| 223642_at   | ZIC2: Zic family member 2 (odd-paired homolog, Drosophila)                                 | -15.43 | 0      | 0        | -13.46 | 0.0012   | 0        | -8.58 | 0        | 0        | -8.18 | 0.0011 | 0        |
| 227930_at   | <b>Translation initiation</b><br>EIF2C4: mRNA: cDNA DKFZp547H229 (from clone DKFZp547H229) |        |        |          | 2.47   | 0.0499   | 3.00E-04 |       |          |          | 2.86  | 0.0317 | 1.00E-04 |
|             | <b>Other</b>                                                                               |        |        |          |        |          |          |       |          |          |       |        |          |
| 221986_s_at | KLHL24: kelch-like 24 (Drosophila)                                                         | 5.07   | 0.0042 | 0        | 4.79   | 0.006    | 0        | 4.25  | 0.006    | 0        | 4.69  | 0.0054 | 0        |
| 209763_at   | CHRD1: chordin-like 1                                                                      | 4.28   | 0.0088 | 0        | 4.13   | 0.0086   | 0        | 9.52  | 0        | 0        | 10.21 | 0      | 0        |
| 1555279_at  | ARMC8: armadillo repeat containing 8                                                       | -2.57  | 0.0309 | 1.00E-04 | -2.60  | 0.0292   | 1.00E-04 | -2.49 | 0.0143   | 0        | -2.41 | 0.0146 | 0        |
|             | <b>Unknown function</b>                                                                    |        |        |          |        |          |          |       |          |          |       |        |          |
| 235874_at   | PRSS35: protease, serine, 35                                                               |        |        |          | 9.93   | 9.00E-04 | 0        |       |          |          | 2.95  | 0.0294 | 1.00E-04 |
| 235976_at   | SLITRK6: SLIT and NTRK-like family, member 6                                               | 2.74   | 0.0356 | 1.00E-04 | 3.39   | 0.0156   | 0        | 7.50  | 5.00E-04 | 0        | 10.16 | 0      | 0        |
| 1552389_at  | C8orf47: chromosome 8 open reading frame 47                                                | 4.78   | 0.0048 | 0        | 3.83   | 0.0099   | 0        | 3.33  | 0.0134   | 0        | 2.73  | 0.0365 | 2.00E-04 |
| 238673_at   | SAMD12: clone TEC_AC113188.2-001_REV mRNA sequence                                         | 4.31   | 0.0082 | 0        | 4.61   | 0.006    | 0        | 3.09  | 0.016    | 0        | 3.90  | 0.0117 | 0        |
| 244741_s_at | MGC9913: hypothetical protein MGC9913                                                      | 3.92   | 0.0117 | 0        | 3.64   | 0.0129   | 0        | 4.22  | 0.0059   | 0        | 4.15  | 0.0082 | 0        |
| 53720_at    | C19orf66: chromosome 19 open reading frame 66                                              | 2.64   | 0.0404 | 2.00E-04 | 2.94   | 0.0177   | 0        | 3.01  | 0.0177   | 0        | 3.49  | 0.0168 | 0        |
| 234989_at   | NCRNA00084: non-protein coding RNA 84                                                      |        |        |          | 2.52   | 0.0461   | 2.00E-04 |       |          |          | 2.76  | 0.0356 | 1.00E-04 |
| 239319_at   | LOC728342: CDNA clone IMAGE:5297581                                                        | 3.19   | 0.0233 | 1.00E-04 | 3.26   | 0.0177   | 0        | 2.67  | 0.029    | 1.00E-04 | 2.72  | 0.0372 | 2.00E-04 |
| 223268_at   | C11orf54: chromosome 11 open reading frame 54                                              | 3.05   | 0.0252 | 1.00E-04 | 3.25   | 0.0432   | 2.00E-04 | 2.33  | 0.0432   | 2.00E-04 | 2.98  | 0.0288 | 1.00E-04 |
| 226811_at   | FAM46C: family with similarity 46, member C                                                | 2.53   | 0.0466 | 3.00E-04 | 2.56   | 0.0432   | 2.00E-04 | 2.67  | 0.0282   | 1.00E-04 | 3.08  | 0.0258 | 1.00E-04 |
| 1558404_at  | LOC644242: hypothetical protein LOC644242, mRNA                                            | -3.44  | 0.0075 | 0        | -3.01  | 0.0143   | 0        | -2.48 | 0.0143   | 0        | -2.12 | 0.0253 | 1.00E-04 |
| 224920_x_at | MYADM: myeloid-associated differentiation marker                                           | -3.24  | 0.0078 | 0        | -3.42  | 0.0117   | 0        | -2.17 | 0.0248   | 1.00E-04 | -1.98 | 0.0318 | 1.00E-04 |
| 238460_at   | FAM83A: family with sequence similarity 83, member A                                       | -7.04  | 0.0024 | 0        | -5.51  | 0.003    | 0        | -2.45 | 0.0175   | 0        | -2.85 | 0.0075 | 0        |

**Table 2.** Clustered common genes showing deregulated pattern of expression in docetaxel resistant DU145 T2 cell line as compared to the parental docetaxel sensitive DU145 cells. The gene list shows values obtained with RankProd method. FC (fold change): Blank field = no change. Positive value = elevated expression. Negative value = lowered expression. FDR = false discovery rate

| PROBE SET                                      | GENE                                                                                    | FC    | FDR      | P value  |
|------------------------------------------------|-----------------------------------------------------------------------------------------|-------|----------|----------|
| <b>Regulation of cell death/apoptosis</b>      |                                                                                         |       |          |          |
| 210145_at                                      | PLA2G4A: phospholipase A2, group IVA (cytosolic, calcium-dependent)                     | 3.31  | 0.0028   | 0        |
| 204684_at                                      | NPTX1: neuronal pentaxin 1                                                              | 2.61  | 0.0067   | 0        |
| 219257_s_at                                    | SPHK1: sphingosine kinase 1                                                             | 2.26  | 0.0132   | 0        |
| 203381_s_at                                    | APOE: apolipoprotein E                                                                  | 2.19  | 0.0167   | 0        |
| 204224_s_at                                    | GCH1: GTP cyclohydrolase 1                                                              | 2.1   | 0.0277   | 0        |
| 242138_at                                      | DLX1: distal-less homeobox1                                                             | 1.99  | 0.0415   | 1.00E-04 |
| 217999_s_at                                    | PHLDA1: pleckstrin homology-like domain, familyA, member 1                              | 1.92  | 0.0415   | 1.00E-04 |
| 203508_at                                      | TNFRSF1B: tumor necrosis factor receptor superfamily, member 1B                         | 1.9   | 0.0421   | 1.00E-04 |
| 223333_s_at                                    | ANGPTL4: angiopoietin-like 4                                                            | 1.9   | 0.042    | 1.00E-04 |
| 202086_at                                      | MX1: myxovirus (influenza virus) resistance 1, interferon-inducible protein p78 (mouse) | 1.89  | 0.0444   | 1.00E-04 |
| 208792_s_at                                    | CLU: clusterin                                                                          | -2.06 | 0.0455   | 2.00E-04 |
| 206814_at                                      | NGF: nerve growth factor (beta polypeptide)                                             | -2.14 | 0.0386   | 2.00E-04 |
| 206569_at                                      | IL24: interleukin 24                                                                    | -2.18 | 0.0366   | 1.00E-04 |
| 215990_s_at                                    | BCL6: B-cell CLL/lymphoma 6                                                             | -2.21 | 0.0017   | 1.00E-04 |
| 212609_s_at                                    | AKT3: A-akt murine thymoma viral oncogene homolog 3 (protein kinase B, gamma)           | -2.21 | 0.0348   | 1.00E-04 |
| 212063_at                                      | CD44: CD44 molecule (Indian blood group)                                                | -2.37 | 0.0255   | 1.00E-04 |
| 227961_at                                      | CTSB: cathepsin B                                                                       | -2.53 | 0.0211   | 0        |
| 214203_s_at                                    | PRODH: proline dehydrogenase (oxydase) 1                                                | -2.54 | 0.0208   | 0        |
| 208965_s_at                                    | IFI16: interferon, gamma-inducible protein 16                                           | -2.6  | 0.0194   | 0        |
| 225606_at                                      | BCL2L11: BCL2-like 11 (apoptosis facilitator)                                           | -2.8  | 0.0143   | 0        |
| 215719_x_at                                    | FAS: fas (TNF receptor superfamily, member 6)                                           | -2.91 | 0.0121   | 0        |
| 209772_s_at                                    | CD24: CD24 molecule                                                                     | -4.68 | 0.0014   | 0        |
| 227828_s_at                                    | FAM176A: family with sequence similarity 176< member A                                  | -6.56 | 0        | 0        |
| <b>Regulation of cell cycle</b>                |                                                                                         |       |          |          |
| 1555772_a_at                                   | CDC25A: cell division cycle 25 homolog A (S.pombe)                                      | 2.29  | 0.0136   | 0        |
| 231769_at                                      | FBXO6: F-boxprotein 6                                                                   | 2.22  | 0.0145   | 0        |
| 229671_s_at                                    | C21orf45: Chromosome 21 open reading frame 45                                           | 2.06  | 0.0277   | 1.00E-04 |
| 217010_s_at                                    | CDC25C: cell division cycle 25 homolog C (S.Pombe)                                      | 1.98  | 0.0335   | 1.00E-04 |
| 211088_s_at                                    | PLK4: Polo-like kinase 4 (Drosophila)                                                   | 1.93  | 0.0396   | 1.00E-04 |
| 209891_at                                      | SPC25: SPC25, NDC80 kinetochore complex component, homolog (S.cerevisiae)               | 1.89  | 0.0452   | 2.00E-04 |
| 203323_at                                      | CAV2: calveolin 2                                                                       | -2.04 | 0.0484   | 2.00E-04 |
| 1553055_a_at                                   | SLFN5: schlafen family member 5                                                         | -2.9  | 0.0125   | 0        |
| 235683_at                                      | SESN3: sestrin 3                                                                        | -3.15 | 0.0098   | 0        |
| <b>Regulation of cell growth/proliferation</b> |                                                                                         |       |          |          |
| 214974_x_at                                    | CXCL5: chemokonie (C-X-C motif) ligand 5                                                | 7.53  | 0        | 0        |
| 201667_at                                      | GJA1: gap junction protein, alpha 1, 43 kDa                                             | 4.34  | 5.00E-04 | 0        |
| 231798_at                                      | NOG: noggin                                                                             | 3.19  | 0.0031   | 0        |
| 242996_at                                      | MTRF1: mitochondrial translational release factor 1                                     | 2.11  | 0.0211   | 0        |
| 211017_s_at                                    | NF2: neurofibromin 2 (merlin)                                                           | 2.04  | 0.0313   | 1.00E-04 |
| 205032_at                                      | ITGA2: integrin, alpha 2 (CD49B, alpha 2 subunit of VLA-2 receptor)                     | 2.02  | 0.0296   | 1.00E-04 |
| 228834_at                                      | TOB1: transducer of ERBB2, 1                                                            | -2.1  | 0.0424   | 2.00E-04 |
| 226016_at                                      | CD47: CD47 molecule                                                                     | -2.17 | 0.0366   | 1.00E-04 |
| 201508_at                                      | IGFBP4: insulin-like growth factor binding protein 4                                    | -2.27 | 0.0316   | 1.00E-04 |
| 213010_at                                      | PRKCDBP: protein kinase C, delta binding protein                                        | -2.28 | 0.0318   | 1.00E-04 |
| 201324_at                                      | EMP1: epithelial membrane protein 1                                                     | -2.44 | 0.0227   | 1.00E-04 |
| 205792_at                                      | WISP2: WINT1 inducible signaling pathway protein 2                                      | -2.53 | 0.0208   | 0        |
| 206343_s_at                                    | NRG1: neuregulin 1                                                                      | -2.67 | 0.0181   | 0        |
| 222802_at                                      | EDN1: endothelin 1                                                                      | -3.44 | 0.0067   | 0        |
| 205627_at                                      | CDA: cytidine deaminase                                                                 | -3.55 | 0.0056   | 0        |

|                                                         |                                                                                 |       |          |          |
|---------------------------------------------------------|---------------------------------------------------------------------------------|-------|----------|----------|
| 205014_at                                               | FGFBP1: fibroblast growth factor binding protein 1                              | -4.32 | 0.0022   | 0        |
| 205207_at                                               | IL6: interleukin 6 (interferon, beta 2)                                         | -4.82 | 0.0015   | 0        |
| <b>Extracellular matrix/cell adhesion and junctions</b> |                                                                                 |       |          |          |
| 218435_at                                               | DNAJC15: DnaJ (HSP40) homolog, subfamily C, member 15                           | 7.55  | 0        | 0        |
| 202790_at                                               | CLDN7: claudin 7                                                                | 2.89  | 0.0039   | 0        |
| 201839_s_at                                             | EPCAM: epithelial cell adhesion molecule                                        | 2.59  | 0.0068   | 0        |
| 218182_s_at                                             | CLDN1: claudin 1                                                                | 2.45  | 0.0083   | 0        |
| 203417_at                                               | MFAP2: microfibrillar-associated protein 2                                      | 2.13  | 0.0241   | 0        |
| 209277_at                                               | TFPI2: tissue factor pathway inhibitor 2                                        | 2.13  | 0.0132   | 0        |
| 211340_s_at                                             | MCAM: melanoma cell adhesion molecule                                           | 2.03  | 0.0302   | 1.00E-04 |
| 235955_at                                               | MARVEL domain containing 2                                                      | 1.97  | 0.0342   | 1.00E-04 |
| 207517_at                                               | LAMC2: laminin, gamma 2                                                         | 1.92  | 0.0416   | 1.00E-04 |
| 211719_x_at                                             | FN1: fibronectin 1                                                              | -2.11 | 0.0401   | 2.00E-04 |
| 212830_at                                               | MEGF9: multiple EGF-like-domains 9                                              | -2.15 | 0.0383   | 1.00E-04 |
| 217478_s_at                                             | HLA-DMA///HLA-DMB: major histocompatibility complex, class II, DM alpha         | -2.17 | 0.0366   | 1.00E-04 |
| 200923_at                                               | LGALS3BP: lectin, galactoside-binding soluble, 3 binding protein                | -2.21 | 0.035    | 1.00E-04 |
| 202363_at                                               | SPOCK1: spart/osteonectin, cwcv and katal-like domain proteoglycan (testican) 1 | -2.24 | 0.0335   | 1.00E-04 |
| 225242_s_at                                             | CCDC80: coiled-coil domain containing 80                                        | -2.27 | 0.0319   | 1.00E-04 |
| 242722_at                                               | LMO7: LIM domain 7                                                              | -2.31 | 0.0281   | 1.00E-04 |
| 206033_s_at                                             | DSC3: desmocolin 3                                                              | -2.33 | 0.0281   | 1.00E-04 |
| 226145_s_at                                             | FRAS1: Fraser syndrome 1                                                        | -2.54 | 0.0212   | 0        |
| 225189_s_at                                             | RAPH1: Ras associated (RalGDS/AF-6) and pleckstrin homology domain 1            | -2.58 | 0.0193   | 0        |
| 201645_at                                               | TNC: tenascin C                                                                 | -3.28 | 0.0076   | 0        |
| 215446_s_at                                             | LOX: lysyl oxydase                                                              | -3.5  | 0.0063   | 0        |
| 226189_at                                               | ITBG8: integrin, beta 8                                                         | -4.67 | 0.0015   | 0        |
| 203757_s_at                                             | CEACAM6: carcinoembryonic antigen-related cell adhesion molecule 6              | -6.77 | 0        | 0        |
| 203779_s_at                                             | MPZL2: myelin protein zero-like 2                                               | -6.87 | 0        | 0        |
| <b>Cytoskeleton (other than microtubule)</b>            |                                                                                 |       |          |          |
| 204465_s_at                                             | INA: internexin neuronal intermediate filament protein, alpha                   | 4.81  | 7.00E-04 | 0        |
| 231248_at                                               | CST6: Cystatin E/M                                                              | 2.63  | 0.0065   | 0        |
| 229292_at                                               | EPB41L5: erythrocyte membrane protein band 4.1 like 5                           | 2.25  | 0.0143   | 0        |
| 212339_at                                               | EPB41L1: erythrocyte membrane protein band 4.1 like 1                           | -2.04 | 0.0482   | 2.00E-04 |
| 202555_s_at                                             | MYLK: myosin light chain kinase                                                 | -2.04 | 0.0482   | 2.00E-04 |
| 205428_s_at                                             | CALB2: calbindin 2                                                              | -2.12 | 0.0399   | 2.00E-04 |
| 221870_at                                               | EHD2: EH-domain containing 2                                                    | -2.13 | 0.0397   | 2.00E-04 |
| 202668_at                                               | EFNB2: ephrin-B2                                                                | -2.19 | 0.0366   | 1.00E-04 |
| 205347_s_at                                             | TMSB15A: thymosin beta 15a                                                      | -2.23 | 0.0341   | 1.00E-04 |
| 200696_s_at                                             | GSN: gelsolin (amyloidosis, Finnish type)                                       | -2.32 | 0.0283   | 1.00E-04 |
| 206884_s_at                                             | SCEL: scielin                                                                   | -2.47 | 0.0225   | 1.00E-04 |
| 228256_s_at                                             | EPB41L4A: erythrocyte membrane protein band 4.1 like 4A                         | -2.87 | 0.0126   | 0        |
| 201976_s_at                                             | MYO10: myosin X                                                                 | -3.27 | 0.0076   | 0        |
| <b>Microtubule cytoskeleton</b>                         |                                                                                 |       |          |          |
| 202890_at                                               | MAP7: microtubule-associated protein 7                                          | 3.11  | 0.0029   | 0        |
| 242283_at                                               | DNAH14: dynein, axonemal, heavy chain 14                                        | 2.41  | 0.0098   | 0        |
| 1568678_s_at                                            | FGFR1OP: FGFR1 oncogene partner                                                 | 1.98  | 0.0145   | 1.00E-04 |
| 202275_at                                               | G6PD: glucose-6-phosphate dehydrogenase                                         | -2.06 | 0.0427   | 2.00E-04 |
| 204610_s_at                                             | CCDC85B: coiled-coil domain containing 85B                                      | -2.12 | 0.0399   | 2.00E-04 |
| 228905_at                                               | PCM1: pericentriolar material 1                                                 | -2.16 | 0.0383   | 2.00E-04 |
| 207526_s_at                                             | IL1RL1: interleukin 1 receptor-like                                             | -2.41 | 0.0242   | 1.00E-04 |
| 225540_at                                               | MAP2: microtubule-associated protein 2                                          | -3.3  | 0.0072   | 0        |
| 224772_at                                               | NAV1: neuron navigator 1                                                        | -3.83 | 0.0039   | 0        |
| <b>Response to stress/chemical stimulus</b>             |                                                                                 |       |          |          |
| 203399_x_at                                             | PSG3: pregnancy specific beta-1-glycoprotein 3                                  | 5.2   | 0        | 0        |
| 206029_at                                               | ANKRD1: ankyrin repeat domain 1 (cardiac muscle)                                | 4.48  | 6.00E-04 | 0        |
| 219936_s_at                                             | GPR87: G protein coupled receptor 87                                            | 3.47  | 6.00E-04 | 0        |
| 221667_s_at                                             | HSPB8: heat shock 22kDa protein 8                                               | 3.01  | 0.0029   | 0        |
| 209594_x_at                                             | PSG9: pregnancy specific beta-1-glycoprotein 9                                  | 2.36  | 0.0103   | 0        |
| 209738_x_at                                             | PSG6: pregnancy specific beta-1-glycoprotein 6                                  | 2.36  | 0.01     | 0        |

|                                          |                                                                                               |       |          |          |
|------------------------------------------|-----------------------------------------------------------------------------------------------|-------|----------|----------|
| 204935_at                                | PTPN2: protein tyrosine phosphatase, non-receptor type 2                                      | 2.04  | 0.0367   | 1.00E-04 |
| 209301_at                                | CA2: carbonic anhydrase II                                                                    | 1.97  | 0.0324   | 1.00E-04 |
| 206023_at                                | NMU: neuromedin U                                                                             | 1.94  | 0.0382   | 1.00E-04 |
| 210187_at                                | FKBP1A: FK506 binding protein 1A, 12kDa                                                       | 1.94  | 0.0381   | 1.00E-04 |
| 204363_at                                | F3: coagulation factor III (thromboplastin, tissue factor)                                    | -2.01 | 0.0498   | 2.00E-04 |
| 202180_s_at                              | MVP: major vault protein                                                                      | -2.39 | 0.0246   | 1.00E-04 |
| 200632_s_at                              | NDRG1: N-mycdownstream regulated 1                                                            | -2.45 | 0.0227   | 1.00E-04 |
| 204014_at                                | DUSP4: dual specificity phosphatase 4                                                         | -2.45 | 0.0223   | 1.00E-04 |
| 204396_s_at                              | GRK5: G protein-coupled receptor kinase 5                                                     | -2.5  | 0.0217   | 0        |
| 201739_at                                | SGK1: serum/glucocorticoid regulated kinase 1                                                 | -3.09 | 0.0104   | 0        |
| 205756_s_at                              | F8: coagulation factor VIII, procoagulant component                                           | -3.1  | 0.0104   | 0        |
| 213693_s_at                              | MUC1: mucin1, cell surface associated                                                         | -3.23 | 0.0081   | 0        |
| 202833_s_at                              | SERPINA1: serpin peptidase inhibitor, clade A (alpha-1 antiproteinase, antitrypsin), member 1 | -4.65 | 0.0014   | 0        |
| 209392_at                                | ENPP2: ectonucleotide pyrophosphatase/phosphodiesterase 2                                     | -6.39 | 0        | 0        |
| <b>Receptors</b>                         |                                                                                               |       |          |          |
| 240042_at                                | FIBCD1: fibrinogen C domain containing 1                                                      | 3.32  | 0.0011   | 0        |
| 219789_at                                | NPR3: natriuretic peptide receptorC/guanylate cyclase C (atrionatriuretic peptide receptor C) | 2.36  | 0.0099   | 0        |
| 203632_s_at                              | GPRC5B: G protein coupled receptor, family C, group 5, member B                               | 2.26  | 0.0141   | 0        |
| 205945_at                                | IL6R: interleukin 6 receptor                                                                  | 2.1   | 0.0233   | 0        |
| 225661_at                                | IFNAR1: interferon (alpha, beta and omega) receptor 1                                         | 1.94  | 0.0379   | 1.00E-04 |
| 211924_s_at                              | PLAUR: plasminogen activator, urokinase receptor                                              | 1.87  | 0.0471   | 2.00E-04 |
| 204916_at                                | RAMP1: receptor (G protein coupled receptor) activity modifying protein 1                     | -2.15 | 0.0398   | 2.00E-04 |
| 1554199_at                               | PTPRO: protein tyrosine phosphatase, receptor type, O                                         | -2.32 | 0.0279   | 1.00E-04 |
| 207526_s_at                              | IL1RL1: interleukin 1 receptor-like 1                                                         | -2.4  | 0.0242   | 1.00E-04 |
| 227449_at                                | EPHA4: EPH receptor A4                                                                        | -2.61 | 0.0192   | 0        |
| 219476_at                                | C1orf116: chromosome 1 open reading frame 116                                                 | -3.5  | 0.0064   | 0        |
| 228573_at                                | ANTXR2: anthrax toxin receptor 2                                                              | -5.64 | 4.00E-04 | 0        |
| <b>Protein kinase regulator activity</b> |                                                                                               |       |          |          |
| 231120_x_at                              | PKIB: protein kinase (cAMP-dependent, catalytic) inhibitor beta                               | 2.25  | 0.0163   | 0        |
| 226864_at                                | PKIA: protein kinase (cAMP-dependent, catalytic) inhibitor alpha                              | -2.18 | 0.0367   | 1.00E-04 |
| <b>Signal transducer activity</b>        |                                                                                               |       |          |          |
| 230925_at                                | APBB1P: amyloid beta (A4) precursor protein-binding family B, member 1 interacting protein    | 2.51  | 0.0079   | 0        |
| 228882_at                                | TUB: tubby homolog (mouse)                                                                    | 2.06  | 0.0271   | 1.00E-04 |
| 221029_s_at                              | WNT5B: wingless-type MMTV integration site family, member 5B                                  | 1.9   | 0.0422   | 1.00E-04 |
| 214247_s_at                              | DKK3: dickkopf homolog 3 (Xenopus laevis)                                                     | -2.04 | 0.0472   | 2.00E-04 |
| 202286_s_at                              | TACSTD2: tumor-associated calcium signal transducer 2                                         | -2.08 | 0.0429   | 2.00E-04 |
| <b>GTPase binding activity</b>           |                                                                                               |       |          |          |
| 204803_s_at                              | RRAD: ras-related associated with diabetes                                                    | 2.2   | 0.0152   | 0        |
| 231577_s_at                              | GBP1: guanylate binding protein1, interferon-inducible, 67kDa                                 | 2.11  | 0.0239   | 0        |
| 230075_at                                | RAB39B: RAB39B, member RAS oncogene family                                                    | -2.11 | 0.0426   | 2.00E-04 |
| 228708_at                                | RAB27B: RAB27B, member RAS oncogene family                                                    | -2.49 | 0.0223   | 1.00E-04 |
| 217762_s_at                              | RAB31: RAB31 member RAS oncogene family                                                       | -2.8  | 0.0142   | 0        |
| <b>GTPase regulator activity</b>         |                                                                                               |       |          |          |
| 233115_at                                | DEPDC1B: DEP domain containing 1B                                                             | 2.92  | 0.0039   | 0        |
| 202388_at                                | RGS2: regulator of G-protein signaling2, 24kDa                                                | 2.68  | 0.0058   | 0        |
| 222173_s_at                              | TBC1D2: TBC1 domain family, member 2                                                          | -2.36 | 0.0264   | 1.00E-04 |
| 225496_s_at                              | SYTL2: synaptotagmin-like 2                                                                   | -2.36 | 0.0255   |          |
| 228171_s_at                              | PLEKHG4: pleckstrin homology domain containing, family G (with RhoGef domain) member 4        | -2.37 | 0.0248   | 1.00E-04 |
| 226875_at                                | DOCK11: dedicator of cytokinesis 11                                                           | -3.02 | 0.0116   | 0        |
| <b>Endocytosis</b>                       |                                                                                               |       |          |          |
| 204840_s_at                              | EEA1: early endosome antigen 1                                                                | 2.09  | 0.0238   | 0        |
| 212990_at                                | SYNJ1: synaptojanin 1                                                                         | 1.99  | 0.0325   | 1.00E-04 |
| 1558021_at                               | RABEPK: Rab9 effector protein with kelch motifs                                               | 1.89  | 0.047    | 2.00E-04 |



|                                                   |                                                                                                                                                          |        |          |          |
|---------------------------------------------------|----------------------------------------------------------------------------------------------------------------------------------------------------------|--------|----------|----------|
| 203485_at                                         | RTN1: reticulon 1                                                                                                                                        | -3.51  | 0.0067   | 0        |
| <b>Transporter activity and metabolic process</b> |                                                                                                                                                          |        |          |          |
| 238066_at                                         | RBP7: Retinol binding protein 7, cellular                                                                                                                | 3.88   | 4.00E-04 | 0        |
| 239913_at                                         | SLC10A4: solute carrier family 10 (sodium/bile acid cotransporter family), member 4                                                                      | 3.13   | 0.003    | 0        |
| 205097_at                                         | SLC26A2: solute carrier family 26( sulfate transporter), member 2                                                                                        | 3.08   | 0.0028   | 0        |
| 209735_at                                         | ABCG2: ATP-binding cassette, sub-family G (WHITE), member 2                                                                                              | 2.77   | 0.0057   | 0        |
| 218792_s_at                                       | BSPRY: B-box and SPRY domain containing                                                                                                                  | 2.39   | 0.0103   | 0        |
| 214769_at                                         | CLCN4: chloride channel 4                                                                                                                                | 2.34   | 0.0106   | 0        |
| 236420_s_at                                       | ANO4: anoctamin 4                                                                                                                                        | 2.22   | 0.0151   | 0        |
| 210286_s_at                                       | SLC4A7: solute carrier family 4, sodium bicarbonate cotransporter, member 7                                                                              | 2.1    | 0.0269   | 1.00E-04 |
| 206698_at                                         | XK: X-linked Kx blood group (McLeod syndrome)                                                                                                            | 1.96   | 0.037    | 1.00E-04 |
| 242690_at                                         | ATP11C: ATPase, classVI, type 11C                                                                                                                        | -2.02  | 0.0498   | 2.00E-04 |
| 208161_s_at                                       | ABCC3: ATP-binding cassette, sub-family C (CFTR/MRP), member 3                                                                                           | -2.05  | 0.0482   | 2.00E-04 |
| 219529_at                                         | CLIC3: chloride channel 3                                                                                                                                | -2.09  | 0.0427   | 2.00E-04 |
| 244455_at                                         | KCNT2: potassium channel, subfamily T, member 2                                                                                                          | -2.41  | 0.0258   | 1.00E-04 |
| 204368_at                                         | SLCO2A1: solute carrier organic anion transporter family, member 2A1                                                                                     | -2.43  | 0.023    | 1.00E-04 |
| 212136_at                                         | ATP2B4: ATPase, Ca++ transporting, plasma membrane 4                                                                                                     | -2.63  | 0.0193   | 0        |
| 213415_at                                         | CLIC2: chloride intracellular channel 2                                                                                                                  | -2.75  | 0        | 0        |
| 203157_s_at                                       | GLS: glutaminase                                                                                                                                         | -2.77  | 0.0141   | 0        |
| 214255_at                                         | ATP10A: ATPase, classV, type 10A                                                                                                                         | -3.08  | 0.0095   | 0        |
| 204646_at                                         | DPYD: dihydropyrimidine dehydrogenase                                                                                                                    | -3.48  | 0.0063   | 0        |
| <b>Drug metabolism</b>                            |                                                                                                                                                          |        |          |          |
| 202967_at                                         | GSTA4: glutathione S-transferase alpha 4                                                                                                                 | -2.09  | 0.0428   | 2.00E-04 |
| <b>Lipid metabolic process</b>                    |                                                                                                                                                          |        |          |          |
| 218454_at                                         | PLBD1: phospholipase B domain containing 1                                                                                                               | 4.4    | 6.00E-04 | 0        |
| 203180_at                                         | ALDH1A3: aldehyde dehydrogenase 1 family, member A3                                                                                                      | 2.62   | 0.0066   | 0        |
| 227180_at                                         | ELOVL7: ELOVL family member 7, elongation of long chain fatty acids (yeast)                                                                              | 2.45   | 0.0081   | 0        |
| 202982_s_at                                       | ACOT1////ACOT2: acyl-CoA thioesterase 1//// acyl-CoA thioesterase 2                                                                                      | 1.98   | 0.0321   | 1.00E-04 |
| 202481_at                                         | DHRS3: dehydrogenase/reductase (SDR family) member 3                                                                                                     | 1.92   | 0.0417   | 1.00E-04 |
| 203423_at                                         | RBP1: retinol binding protein 1, cellular                                                                                                                | -2.27  | 0.0319   | 1.00E-04 |
| 213288_at                                         | MBOAT2: membrane bound -acyltransferase domain containing 2                                                                                              | -2.75  | 0.0148   | 0        |
| 212230_at                                         | PPAP2B: phosphatidic acid phosphatase 2B                                                                                                                 | -2.85  | 0.0134   | 0        |
| 230076_at                                         | PITPNM3: PITPNM family member 3                                                                                                                          | -2.97  | 0.0121   | 0        |
| 218322_s_at                                       | ACSL5: acyl-CoA synthetase long-chain family member 5                                                                                                    | -3.15  | 0.0097   | 0        |
| 209160_at                                         | AKR1C3: aldo-keto reductase family 1, member C3 (3-alpha hydroxysteroid dehydrogenase tyoe III)                                                          | -9.62  | 0        | 0        |
| 211653_x_at                                       | AKR1C2: aldo-keto reductase family 1, member C2 (dihydrodiol dehydrogenase 2; bile caid binding protein; 3-alpha hydroxysteroid dehydrogenase, type III) | -10.16 | 0        | 0        |
| 204151_x_at                                       | AKR1C1: aldo-keto reductase family 1, member C1 (dihydrodiol dehydrogenase 1; 20-alpha (3-alpha)-hydroxysteroid dehydrogenase)                           | -10.18 | 0        | 0        |
| <b>Carbohydrate metabolic process</b>             |                                                                                                                                                          |        |          |          |
| 219049_at                                         | CSGALNACT1: chondroitin sulfate N-acetylgalactosaminyltransferase 1                                                                                      | 2.9    | 0.004    | 0        |
| 211379_x_at                                       | B3GALNT1: beta-1,3-N-acetylgalactosaminyltransferase 1 (globoside blood group)                                                                           | 2.41   | 0.0101   | 0        |
| 219750_at                                         | TMEM144: transmembrane protein 144                                                                                                                       | 2.18   | 0.0214   | 0        |
| 203397_s_at                                       | GALNT3: UDP-N-acetyl-alpha-Dgalactosamine-polypeptide N-acetylgalactosaminyltransferase 3 (GalNac-T3)                                                    | 1.97   | 0.0367   | 1.00E-04 |
| 214755_at                                         | UAP1L1: UDP-N-acteylglucosamine pyrophosphorylatse 1-like 1                                                                                              | 1.94   | 0.0418   | 1.00E-04 |
| 209696_at                                         | FBP1: fructose-1,6-biphosphatase 1                                                                                                                       | -2.27  | 0.0311   | 1.00E-04 |
| 230183_at                                         | EXT1: exostoses (multiple ) 1                                                                                                                            | -2.29  | 0.0306   | 1.00E-04 |
| 205100_at                                         | GFPT2: glutamine-fructose-6-phosphate transaminase 2                                                                                                     | -2.43  | 0.0228   | 1.00E-04 |
| 208116_s_at                                       | MAN1A1: mannosidase, alpha, class 1A, emeber 1                                                                                                           | -2.44  | 0.0233   | 1.00E-04 |
| 226303_at                                         | PGM5: phosphoglutamase 5                                                                                                                                 | -2.46  | 0.0221   | 1.00E-04 |
| 202242_at                                         | TSPAN7: tetraspanin 7                                                                                                                                    | -3.15  | 0.0099   | 0        |
| <b>Proteolysis</b>                                |                                                                                                                                                          |        |          |          |
| 216905_s_at                                       | ST14: suppression of tumorigenicity 14 (colon carcinoma)                                                                                                 | 3.55   | 7.00E-04 | 0        |
| 201295_s_at                                       | WSB1: WD repeat and SOCS box-containing 1                                                                                                                | 2.36   | 0.0146   | 0        |
| 206239_s_at                                       | SPINK1: serine peptidase inhibitor, Kazal type 1                                                                                                         | 2.34   | 0.0134   | 0        |

|                                            |                                                                                          |       |          |          |
|--------------------------------------------|------------------------------------------------------------------------------------------|-------|----------|----------|
| 202342_s_at                                | TRIM2: tripartite motif-containing 2                                                     | 2.22  | 0.0176   | 0        |
| 238803_at                                  | HECTD2: HECT domain containing 2                                                         | 2.06  | 0.0252   | 1.00E-04 |
| 229441_at                                  | PRSS23: Protease, serine, 23                                                             | -2.32 | 0.0282   | 1.00E-04 |
| 204475_at                                  | MMP1: matrix metalloproteinase 1 (interstitial collagenase)                              | -7.85 | 0        | 0        |
| <b>Chromatin organization</b>              |                                                                                          |       |          |          |
| 205659_at                                  | HDAC9: histone deacetylase                                                               | 2.46  | 0.0087   | 0        |
| 208025_s_at                                | HMGA2: high mobility group AT-hook 2                                                     | 1.87  | 0.0472   | 2.00E-04 |
| 205832_at                                  | CPA4: carboxypeptidase A4                                                                | -2.03 | 0.0481   | 2.00E-04 |
| 202708_s_at                                | HIST2H2BE: histone cluster 2, H2be                                                       | -2.05 | 0.0474   | 2.00E-04 |
| <b>Transcription regulation</b>            |                                                                                          |       |          |          |
| 226847_at                                  | FST: follistatin                                                                         | 3.38  | 0.0024   | 0        |
| 1552946_at                                 | ZNF114: zinc finger protein 114                                                          | 3.29  | 0.0022   | 0        |
| 206683_at                                  | ZNF165: zinc finger protein 165                                                          | 2.79  | 0.004    | 0        |
| 235795_at                                  | PAX6: paired box6                                                                        | 2.47  | 0.0088   | 0        |
| 236471_at                                  | NFE2L3: nuclear factor (erythroid-derived 2)-like 3                                      | 2.35  | 0.0105   | 0        |
| 235121_at                                  | ZNF542: zinc finger protein 542                                                          | 2.32  | 0.0134   | 0        |
| 228698_at                                  | SOX7: SRY (sex determining regionY)-box7                                                 | 2.31  | 0.016    | 0        |
| 1554894_a_at                               | PCBD2: pterin-4-alpha-carbinolamine dehydratase                                          | 2.04  | 0.0309   | 1.00E-04 |
| 242919_at                                  | ZNF253: zinc finger protein 253                                                          | 2.02  | 0.0321   | 1.00E-04 |
| 206653_at                                  | POLR3G: polymerase (RNA) III (DNA directed) polypeptide G (32KD)                         | 2     | 0.0309   | 1.00E-04 |
| 231800_s_at                                | DMRT3: doublesex and mab-3 related transcription factor                                  | 1.97  | 0.0402   | 1.00E-04 |
| 220549_at                                  | RAD54B: RAD54 homolog B (S.cerevisiae)                                                   | 1.94  | 0.0385   | 1.00E-04 |
| 206140_at                                  | LHX2: LIM homeobox2                                                                      | 1.93  | 0.0417   | 1.00E-04 |
| 219459_at                                  | POLR3B: polymerase (RNA) III (DNA directed) polypeptide B                                | 1.91  | 0.0415   | 1.00E-04 |
| 216305_s_at                                | C2orf3: chromosome 2 open reading frame 3                                                | 1.91  | 0.0418   | 1.00E-04 |
| 1552634_a_at                               | ZNF101: zinc finger protein 101                                                          | 1.88  | 0.047    | 2.00E-04 |
| 201823_s_at                                | RNF14: ring finger protein 14                                                            | 1.87  | 0.0473   | 2.00E-04 |
| 228483_s_at                                | TAF9B: TAF9B RNA polymerase II, TATA box binding protein (TBP)-associated factor, 31 kDa | -2.03 | 0.0499   | 2.00E-04 |
| 212124_at                                  | ZMIZ1: zinc finger, MIZ-type containing 1                                                | -2.08 | 0.0428   | 2.00E-04 |
| 203543_s_at                                | KLF9: Kruppel-like factor9                                                               | -2.13 | 0.0395   | 2.00E-04 |
| 219778_at                                  | ZFPM2: zinc finger protein, multitype 2                                                  | -2.24 | 0.0332   | 1.00E-04 |
| 212614_at                                  | ARID5B: AT rich interactive domain 5B (MRF1-like)                                        | -2.25 | 0.0317   | 1.00E-04 |
| 213006_at                                  | CEBPD: CCAAT/enhancer binding protein (C/EBP), delta                                     | -2.33 | 0.0276   | 1.00E-04 |
| 205249_at                                  | EGR2: early growth response 2                                                            | -2.4  | 0.0248   | 1.00E-04 |
| 209212_s_at                                | KLF5: Kruppel-like factor 5                                                              | -2.45 | 0.0233   | 1.00E-04 |
| 209189_at                                  | FOS: FBJ murine osteosarcoma viral oncogene homolog                                      | -2.59 | 0.0193   | 0        |
| 215111_s_at                                | TSC22D1: TSC22 domain family, member 1                                                   | -2.79 | 0.0145   | 0        |
| 223282_at                                  | TSHZ1: teashirt zinc finger homeobox 1                                                   | -2.97 | 0.0121   | 0        |
| 212148_at                                  | PBX1: pre-B-cell leukemia homeobox1                                                      | -4.28 | 0.0023   | 0        |
| 226420_at                                  | MECOM: MDS1 and EVI1 complex locus                                                       | -3.63 | 0,0053   | 0        |
| <b>Transcription coactivator activity</b>  |                                                                                          |       |          |          |
| 236471_at                                  | NFE2L3: nuclear factor (erythroid-derived 2)-like 3                                      | 2.35  | 0.0105   | 0        |
| 209505_at                                  | NR2F1: Nuclear receptor subfamily2, group F, member 1                                    | 1.93  | 0.039    | 1.00E-04 |
| <b>RNA (nucleotide) binding/processing</b> |                                                                                          |       |          |          |
| 225846_at                                  | ESRP1: epithelial splicing regulatory protein 1                                          | 5.49  | 7.00E-04 | 0        |
| 203820_s_at                                | IGF2BP3: insulin-like growth factor 2 mRNA binding protein 3                             | 3.4   | 0.0012   | 0        |
| 1566403_at                                 | SNRPN: small nuclear ribonucleoprotein polypeptide N                                     | 2.28  | 0.0129   | 0        |
| 224828_at                                  | CPEB4: cytoplasmic polyadenylation element protein 4                                     | 2.14  | 0.021    | 0        |
| 205228_at                                  | RBMS2: RNA binding motif, single stranded interacting protein 2                          | 2.09  | 0.0223   | 0        |
| 210117_at                                  | SPAG1: sperm associated antigen 1                                                        | 2.06  | 0.0271   | 1.00E-04 |
| 210802_s_at                                | DIMT1L: DIM1 dimethyladenosine transferase 1-like (S.cerevisiae)                         | 1.96  | 0.0353   | 1.00E-04 |
| 225107_at                                  | HNRNPA2B1: heterogeneous nuclear ribonucleoprotein A2/B1                                 | 1.92  | 0.0473   | 2.00E-04 |
| 241599_at                                  | LSM11: LSM11, U7 small nuclear RNA-associated                                            | 1.89  | 0.0467   | 2.00E-04 |
| 205115_s_at                                | RBM19: RNA-binding motif protein 19                                                      | 1.88  | 0.047    | 2.00E-04 |
| 238447_at                                  | RBMS3: RNA binding motif, single stranded interacting protein                            | -2.47 | 0.0227   | 1.00E-04 |
| <b>Metal ion binding</b>                   |                                                                                          |       |          |          |
| 233819_s_at                                | RNF160: ring finger protein 160                                                          | 2.11  | 0.0228   | 0        |

|                         |                                                                                                                                                                                                             |       |          |          |
|-------------------------|-------------------------------------------------------------------------------------------------------------------------------------------------------------------------------------------------------------|-------|----------|----------|
| 204525_at               | PHF14: PHD finger protein 14                                                                                                                                                                                | 2.08  | 0.0272   | 1.00E-04 |
| 1553938_a_at            | STK32A: serine/threonin kinase 32A                                                                                                                                                                          | 2     | 0.0321   | 1.00E-04 |
| 220144_s_at             | ANKRD5: ankyrin repeat domain 5                                                                                                                                                                             | 1.93  | 0.0383   | 1.00E-04 |
| 217546_at               | MT1M: metallothionein 1M                                                                                                                                                                                    | 1.92  | 0.042    | 1.00E-04 |
| 233167_at               | RP3.402G11.5: selenoprotein O                                                                                                                                                                               | -2.05 | 0.0491   | 2.00E-04 |
| 238440_at               | CLYBL: citrate lyase beta like                                                                                                                                                                              | -2.22 | 0.034    | 1.00E-04 |
| 236884_at               | RIMKLA: ribosomal modification protein rimk-like family member A                                                                                                                                            | -3.1  | 0.0097   | 0        |
| 228855_at               | NUDT7: nudix (nucleoside diphosphate linked moiety X)-type-motif 7                                                                                                                                          | -3.25 | 0.0082   | 0        |
| 213069_at               | HEG1: HEG homolog 1 (zebrafish)                                                                                                                                                                             | -2.68 | 0.0177   | 0        |
| <b>Unknown function</b> |                                                                                                                                                                                                             |       |          |          |
| 242162_at               | WDR69: WD repeat domain 69                                                                                                                                                                                  | 5.71  | 7.00E-04 | 0        |
| 220057_at               | XAGE1A////XAGE1B////XAGE1C////XAGE1D////XAGE1E: X antigen family, member 1A//// X antigen family, member 1B//// X antigen family, member 1C//// X antigen family, member 1D//// X antigen family, member 1E | 3     | 0.0037   | 0        |
| 236917_at               | LRRC34: leucine rich repeat containing 34                                                                                                                                                                   | 2.74  | 0.0055   | 0        |
| 220169_at               | TMEM156: transmembrane protein 156                                                                                                                                                                          | 2.6   | 0.0067   | 0        |
| 216870_x_x_at           | DLEU2: deleted in lymphocytic leukemia 2 (non-protein coding)                                                                                                                                               | 2.58  | 0.0087   | 0        |
| 239148_at               | MARVELD3: MARVEL domain containing 3                                                                                                                                                                        | 2.51  | 0.0102   | 0        |
| 1554333_at              | DNAJA4: DnaJ (Hsp40) homolog, subfamily A, member 4                                                                                                                                                         | 2.47  | 0.0085   | 0        |
| 235148_at               | KRTCAP3: keratinocyte associated protein 3                                                                                                                                                                  | 2.3   | 0.0136   | 0        |
| 238784_at               | DPY19L2: dpy-19-like 2 (C.elegans)                                                                                                                                                                          | 2.27  | 0.0136   | 0        |
| 229759_s_at             | VEPH1: ventricular zone expressed PH domain homolog 1 (zebrafish)                                                                                                                                           | 2.25  | 0.0134   | 0        |
| 1557636_a_at            | C7orf57: chromosome 7 open reading frame 57                                                                                                                                                                 | 2.23  | 0.0144   | 0        |
| 243750_x_x_at           | C21orf70: chromosome 21 open reading frame                                                                                                                                                                  | 2.23  | 0.0148   | 0        |
| 203595_s_at             | IFIT5: interferon-induced protein with tetratricopeptide repeats 5                                                                                                                                          | 2.19  | 0.0155   | 0        |
| 223241_at               | SNX8: sorting nexin 8                                                                                                                                                                                       | 2.17  | 0.017    | 0        |
| 1569433_at              | SAMD5: sterile alpha motif domain containing 5                                                                                                                                                              | 2.16  | 0.0179   | 0        |
| 229865_at               | FNDC3B: fibronectin type III domain containing 3B                                                                                                                                                           | 2.1   | 0.0228   | 0        |
| 218374_s_at             | C12orf4; chromosome 12 open reading frame 4                                                                                                                                                                 | 2.08  | 0.0239   | 0        |
| 226490_at               | NHSL1: NHS-like 1                                                                                                                                                                                           | 1.99  | 0.0324   | 1.00E-04 |
| 1566403_at              | SNORA68: small nuclear RNA, H/ACA box 68                                                                                                                                                                    | 1.97  | 0.0412   | 1.00E-04 |
| 226809_at               | LOC100216479: hypothetical LOC100216479                                                                                                                                                                     | 1.91  | 0.0416   | 1.00E-04 |
| 208092_s_at             | FAM49A: family with sequence similarity 49, member A                                                                                                                                                        | 1.9   | 0.0444   | 2.00E-04 |
| 213285_at               | TMEM30B: transmembrane protein 30B                                                                                                                                                                          | 1.9   | 0.0425   | 1.00E-04 |
| 203023_at               | NOP16: NOP16 nucleolar protein homolog (yeast)                                                                                                                                                              | 1.9   | 0.0418   | 1.00E-04 |
| 228378_at               | C12orf29: chromosome 12 open reading frame 29                                                                                                                                                               | 1.89  | 0.0442   | 1.00E-04 |
| 228875_at               | FAM162B: family with sequence similarity 162, member B                                                                                                                                                      | 1.88  | 0.047    | 2.00E-04 |
| 223059_s_at             | FAM107B: family with sequence similarity 107, member B                                                                                                                                                      | 1.86  | 0.0497   | 2.00E-04 |
| 1569283_at              | hCG_1646157: hGC1646157                                                                                                                                                                                     | 1.95  | 0.0367   | 1.00E-04 |
| 1559060_a_at            | FNIP1: Folliculin interactin protein 1                                                                                                                                                                      | 1.89  | 0.047    | 2.00E-04 |
| 220060_s_at             | C12orf48: chromosome 12 open reading frame 48                                                                                                                                                               | 1.89  | 0.0449   | 2.00E-04 |
| 226349_at               | C12orf45: chromosome 12 open reading frame 45                                                                                                                                                               | 1.88  | 0.0471   | 2.00E-04 |
| 203830_at               | C17orf75: chromosome 17 open reading frame 75                                                                                                                                                               | 1.87  | 0.468    | 2.00E-04 |
| 233504_at               | C9orf84: chromosome 9 open reading frame 84                                                                                                                                                                 | -2.04 | 0.0487   | 2.00E-04 |
| 228979_at               | SFTA3: surfactant associated 3                                                                                                                                                                              | -2.05 | 0.0474   | 2.00E-04 |
| 236044_at               | PPAPDC1A: phosphatidic acid phosphate type 2 domain containing !A                                                                                                                                           | -2.1  | 0.042    | 2.00E-04 |
| 227019_at               | C1orf226: chromosome open reading frame 226                                                                                                                                                                 | -2.12 | 0.0393   | 2.00E-04 |
| 218711_s_at             | SDPR: serum deprivation response (phosphatidylserine binding protein)                                                                                                                                       | -2.13 | 0.0391   | 2.00E-04 |
| 228160_at               | LOC339290: hypothetical LOC339290                                                                                                                                                                           | -2.14 | 0.0383   | 1.00E-04 |
| 231175_at               | BEND6: BEN containing 6                                                                                                                                                                                     | -2.18 | 0.0365   | 1.00E-04 |
| 226382_at               | CAMK1D////LOC283070: calcium/calmodulin-dependent protein kinase ID                                                                                                                                         | -2.26 | 0.0318   | 1.00E-04 |
| 224990_at               | C4orf34: chromosome 4 open reading frame 34                                                                                                                                                                 | -2.32 | 0.0281   | 1.00E-04 |
| 226614_s_at             | FAM167A: family with sequence similarity 167, member A                                                                                                                                                      | -2.45 | 0.0224   | 1.00E-04 |
| 223503_at               | TMEM163: transmembrane protein 163                                                                                                                                                                          | -2.47 | 0.0224   | 1.00E-04 |
| 209183_s_at             | C10orf10: chromosome 10 open reading frame 10                                                                                                                                                               | -2.53 | 0.0208   | 0        |
| 52837_at                | KiAA1644                                                                                                                                                                                                    | -2.88 | 0.0127   | 0        |
| 228325_at               | KAA0146                                                                                                                                                                                                     | -3.12 | 0.0102   | 0        |
| 209755_at               | NMNAT2: nicotinamide nucleotide adenyltransferase 2                                                                                                                                                         | -3.21 | 0.0081   | 0        |
| 238460_at               | FAM83A: family with sequence similarity 83, member A                                                                                                                                                        | -3.33 | 0.007    | 0        |
| 203571_s_at             | C10orf116: chromosome 10 open reading frame 116                                                                                                                                                             | -3.59 | 0.0057   | 0        |
| 230323_s_at             | TMEM45B: transmembrane protein 45B                                                                                                                                                                          | -4.09 | 0.0023   | 0        |

|             |                                                      |       |          |   |
|-------------|------------------------------------------------------|-------|----------|---|
| 226811_at   | FAM46C: family with sequence similarity 46, member C | -4.25 | 0.0024   | 0 |
| 212942_s_at | KIAA1199                                             | -4.99 | 6.00E-04 | 0 |
| 243871_at   | LOC100130476: Similar to hCG2036711                  | -5.68 | 4.00E-04 | 0 |
